# Supplementary material for: Molecular Reactivity and Absorption Properties of Melanoidin Blue-G1 through Conceptual DFT
Source: PubMed Central journal article supplement (PMC6017537; doi:10.3390/molecules23030559), 2018-03-02
Supplement: molecules-23-00559-s001.pdf [file molecules-23-00559-s001.pdf]

**MOLECULAR REACTIVITY AND ABSORPTION PROPERTIES OF  
MELANOIDIN BLUE-G1 THROUGH CONCEPTUAL DFT**

SUPPLEMENTARY INFORMATION

SUPPLEMENTARY INFORMATION

TABLE S1. Maximum wavelength absorption ( $\lambda_{max}$ ) of the Blue-G1 pigment calculated from the HOMO-LUMO gap and from TDDFT results in comparison with experimental value

|           | $\lambda_{max}$ ( <b>HL</b> ) | $\Delta$ ( <b>HL</b> ) | $\lambda_{max}$ ( <b>TDDFT</b> ) | $\Delta$ ( <b>TDDFT</b> ) |
|-----------|-------------------------------|------------------------|----------------------------------|---------------------------|
| CAM-B3LYP | 285                           | 344                    | 527                              | 102                       |
| LC-wBPE   | 202                           | 427                    | 524                              | 105                       |
| M11       | 211                           | 418                    | 523                              | 106                       |
| M11L      | 802                           | 173                    | 559                              | 70                        |
| MN12L     | 764                           | 135                    | 537                              | 92                        |
| MN12SX    | 629                           | 0                      | 535                              | 94                        |
| N12       | 856                           | 227                    | 598                              | 31                        |
| N12SX     | 627                           | 2                      | 533                              | 96                        |
| wB97      | 202                           | 427                    | 521                              | 108                       |
| wB97X     | 210                           | 419                    | 526                              | 103                       |
| wB97XD    | 231                           | 398                    | 529                              | 100                       |

TABLE S2. Calculated bond lengths (in Å) of the Blue-G1 intermediate melanoidin pigment with the MN12SX density functional

| <b>Bond</b> | <b>Distance</b> | <b>Bond</b> | <b>Distance</b> | <b>Bond</b> | <b>Distance</b> | <b>Bond</b> | <b>Distance</b> | <b>Bond</b> | <b>Distance</b> |
|-------------|-----------------|-------------|-----------------|-------------|-----------------|-------------|-----------------|-------------|-----------------|
| R(1-14)     | 1.389           | R(6-54)     | 1.105           | R(11-33)    | 1.442           | R(19-33)    | 1.375           | R(28-45)    | 1.319           |
| R(1-15)     | 1.397           | R(7-17)     | 1.487           | R(11-63)    | 1.102           | R(20-30)    | 1.350           | R(29-46)    | 1.208           |
| R(1-48)     | 1.098           | R(7-23)     | 1.523           | R(11-64)    | 1.103           | R(21-31)    | 1.355           | R(29-47)    | 1.318           |
| R(2-14)     | 1.427           | R(7-55)     | 1.102           | R(12-24)    | 1.526           | R(22-24)    | 1.536           | R(34-73)    | 0.970           |
| R(2-18)     | 1.375           | R(7-56)     | 1.102           | R(12-34)    | 1.404           | R(22-36)    | 1.412           | R(35-74)    | 0.969           |
| R(2-49)     | 1.090           | R(8-26)     | 1.515           | R(12-65)    | 1.105           | R(22-69)    | 1.108           | R(36-75)    | 0.971           |
| R(3-15)     | 1.422           | R(8-30)     | 1.431           | R(12-66)    | 1.112           | R(23-25)    | 1.528           | R(37-76)    | 0.973           |
| R(3-19)     | 1.381           | R(8-57)     | 1.105           | R(13-25)    | 1.525           | R(23-37)    | 1.413           | R(38-77)    | 0.973           |
| R(3-50)     | 1.090           | R(8-58)     | 1.105           | R(13-35)    | 1.403           | R(23-70)    | 1.111           | R(39-78)    | 0.969           |
| R(4-16)     | 1.396           | R(9-27)     | 1.518           | R(13-67)    | 1.111           | R(24-38)    | 1.406           | R(41-79)    | 0.973           |
| R(4-20)     | 1.400           | R(9-31)     | 1.436           | R(13-68)    | 1.105           | R(24-71)    | 1.114           | R(43-80)    | 0.973           |
| R(4-51)     | 1.090           | R(9-59)     | 1.105           | R(14-30)    | 1.412           | R(25-39)    | 1.410           | R(45-81)    | 0.973           |
| R(5-17)     | 1.395           | R(9-60)     | 1.103           | R(15-31)    | 1.413           | R(25-72)    | 1.113           | R(47-82)    | 0.990           |
| R(5-21)     | 1.404           | R(10-28)    | 1.513           | R(16-32)    | 1.380           | R(26-40)    | 1.205           | R(37-82)    | 1.730           |
| R(5-52)     | 1.090           | R(10-32)    | 1.431           | R(17-33)    | 1.381           | R(26-41)    | 1.324           | R(44-77)    | 1.874           |
| R(6-16)     | 1.486           | R(10-61)    | 1.105           | R(18-20)    | 1.416           | R(27-42)    | 1.206           |             |                 |
| R(6-22)     | 1.532           | R(10-62)    | 1.105           | R(18-32)    | 1.375           | R(27-43)    | 1.323           |             |                 |
| R(6-53)     | 1.107           | R(11-29)    | 1.522           | R(19-21)    | 1.411           | R(28-44)    | 1.209           |             |                 |

SUPPLEMENTARY INFORMATION

TABLE S3. Calculated bond angles (in °) of the Blue-G1 intermediate melanoidin pigment with the MN12SX density functional

| <b>Bond</b> | <b>Angle</b> | <b>Bond</b> | <b>Angle</b> | <b>Bond</b> | <b>Angle</b> | <b>Bond</b> | <b>Angle</b> | <b>Bond</b> | <b>Angle</b> |
|-------------|--------------|-------------|--------------|-------------|--------------|-------------|--------------|-------------|--------------|
| A(14-1-15)  | 130.8        | A(21-5-52)  | 129.6        | A(8-30-14)  | 126.9        | A(11-33-17) | 129.6        | A(19-21-31) | 108.1        |
| A(14-1-48)  | 114.5        | A(5-21-19)  | 108.6        | A(8-30-20)  | 123.9        | A(11-33-19) | 122.8        | A(24-22-36) | 110.7        |
| A(1-14-2)   | 131.3        | A(5-21-31)  | 143.3        | A(57-8-58)  | 105.5        | A(63-11-64) | 108.4        | A(24-22-69) | 107.8        |
| A(1-14-30)  | 120.4        | A(16-6-22)  | 115.6        | A(27-9-31)  | 114.8        | A(24-12-34) | 114.1        | A(22-24-38) | 110.8        |
| A(15-1-48)  | 114.7        | A(16-6-53)  | 108.3        | A(27-9-59)  | 106.9        | A(24-12-65) | 107.4        | A(22-24-71) | 107.9        |
| A(1-15-3)   | 132.1        | A(16-6-54)  | 111.2        | A(27-9-60)  | 107.9        | A(24-12-66) | 108.7        | A(36-22-69) | 105.8        |
| A(1-15-31)  | 119.6        | A(6-16-32)  | 121.9        | A(9-27-42)  | 121.6        | A(12-24-22) | 112.3        | A(22-36-75) | 108.5        |
| A(14-2-18)  | 105.8        | A(22-6-53)  | 106.6        | A(9-27-43)  | 117.8        | A(12-24-38) | 106.8        | A(25-23-37) | 109.4        |
| A(14-2-49)  | 126.1        | A(22-6-54)  | 108.5        | A(31-9-59)  | 108.5        | A(12-24-71) | 107.9        | A(25-23-70) | 106.3        |
| A(2-14-30)  | 108.3        | A(6-22-24)  | 113.4        | A(31-9-60)  | 112.0        | A(34-12-65) | 107.6        | A(23-25-39) | 103.9        |
| A(18-2-49)  | 128.1        | A(6-22-36)  | 109.4        | A(9-31-15)  | 125.9        | A(34-12-66) | 111.9        | A(23-25-72) | 108.0        |
| A(2-18-20)  | 109.4        | A(6-22-69)  | 109.6        | A(9-31-21)  | 125.8        | A(12-34-73) | 106.7        | A(37-23-70) | 109.5        |
| A(2-18-32)  | 142.9        | A(53-6-54)  | 106.0        | A(59-9-60)  | 106.4        | A(65-12-66) | 106.8        | A(23-37-76) | 107.5        |
| A(15-3-19)  | 105.7        | A(17-7-23)  | 111.9        | A(28-10-32) | 113.2        | A(25-13-35) | 113.3        | A(23-37-82) | 132.4        |
| A(15-3-50)  | 126.4        | A(17-7-55)  | 111.2        | A(28-10-61) | 108.4        | A(25-13-67) | 107.7        | A(38-24-71) | 111.1        |
| A(3-15-31)  | 108.3        | A(17-7-56)  | 108.3        | A(28-10-62) | 108.5        | A(25-13-68) | 109.9        | A(24-38-77) | 108.8        |
| A(19-3-50)  | 127.9        | A(7-17-33)  | 123.0        | A(10-28-44) | 123.8        | A(13-25-23) | 115.0        | A(39-25-72) | 111.4        |
| A(3-19-21)  | 109.7        | A(23-7-55)  | 110.0        | A(10-28-45) | 116.2        | A(13-25-39) | 110.3        | A(25-39-78) | 109.4        |
| A(3-19-33)  | 142.3        | A(23-7-56)  | 108.2        | A(32-10-61) | 109.1        | A(13-25-72) | 108.2        | A(40-26-41) | 120.8        |
| A(16-4-20)  | 105.3        | A(7-23-25)  | 114.8        | A(32-10-62) | 111.7        | A(35-13-67) | 111.4        | A(26-41-79) | 112.8        |
| A(16-4-51)  | 125.6        | A(7-23-37)  | 108.4        | A(10-32-16) | 127.6        | A(35-13-68) | 107.5        | A(42-27-43) | 120.6        |
| A(4-16-6)   | 127.4        | A(7-23-70)  | 108.4        | A(10-32-18) | 124.3        | A(13-35-74) | 108.4        | A(27-43-80) | 113.1        |
| A(4-16-32)  | 110.6        | A(55-7-56)  | 107.0        | A(61-10-62) | 105.6        | A(67-13-68) | 106.8        | A(44-28-45) | 120.0        |
| A(20-4-51)  | 129.2        | A(26-8-30)  | 112.6        | A(29-11-33) | 110.5        | A(14-30-20) | 108.0        | A(28-44-77) | 136.4        |
| A(4-20-18)  | 108.8        | A(26-8-57)  | 108.5        | A(29-11-63) | 108.9        | A(15-31-21) | 108.2        | A(28-45-81) | 113.2        |
| A(4-20-30)  | 142.7        | A(26-8-58)  | 109.1        | A(29-11-64) | 108.0        | A(16-32-18) | 107.6        | A(46-29-47) | 121.2        |
| A(17-5-21)  | 105.3        | A(8-26-40)  | 123.6        | A(11-29-46) | 122.6        | A(17-33-19) | 107.5        | A(29-47-82) | 111.9        |
| A(17-5-52)  | 125.1        | A(8-26-41)  | 115.6        | A(11-29-47) | 116.1        | A(20-18-32) | 107.6        | A(76-37-82) | 105.8        |
| A(5-17-7)   | 126.4        | A(30-8-57)  | 109.0        | A(33-11-63) | 110.0        | A(18-20-30) | 108.5        | A(38-77-44) | 165.1        |
| A(5-17-33)  | 110.6        | A(30-8-58)  | 112.0        | A(33-11-64) | 111.0        | A(21-19-33) | 108.0        | A(47-82-37) | 160.8        |
